# Supplementary material for: Origin of ligand effects on reactivities of pincer-Pd catalyzed hydrocarboxylation of allenes and alkenes with formate salts: a computational study
Source: Royal Society of Chemistry journal article supplement (doi:10.1039/c8cy00405f), 2018-01-01
Supplement: c8cy00405f1.pdf [file c8cy00405f1.pdf]

## Electronic Supplementary Information (ESI)

### Origin of ligand effects on reactivities of pincer-Pd catalyzed hydrocarboxylation of allenes and alkenes with formate salts: a computational study

Xiangying Lv<sup>a</sup>, Fang Huang<sup>b</sup>, Yan-Bo Wu<sup>c</sup> and Gang Lu<sup>\*,d</sup>

<sup>a</sup>Key Laboratory for Yellow River and Huai River Water Environment and Pollution Control, Ministry of Education, Henan Key Laboratory for Environmental Pollution Control, School of Environment, Henan Normal University, Xinxiang, Henan 453007, P. R. China

<sup>b</sup>College of Chemistry, Chemical Engineering and Materials Science, Shandong Normal University, Jinan 250014, P. R. China

<sup>c</sup>Key Lab for Materials of Energy Conversion and Storage of Shanxi Province and Key Lab of Chemical Biology and Molecular Engineering of Ministry of Education, Institute of Molecular Science, Shanxi University, Taiyuan, Shanxi, 030006, P. R. China

<sup>d</sup>Department of Chemistry, University of Pittsburgh, Pittsburgh, PA, USA

Correspondence to: [gal40@pitt.edu](mailto:gal40@pitt.edu)

## Table of Contents

|                                                                            |    |
|----------------------------------------------------------------------------|----|
| Comparison of hydrocarboxylation barriers using different functionals..... | S2 |
| Energy profile of Pd-catalyzed styrene hydrocarboxylation .....            | S3 |
| Distortion/interaction analysis for 11-TS, 14-TS and 15-TS.....            | S4 |
| Disfavored conformers of CO <sub>2</sub> insertion transition states.....  | S5 |
| Ligand electronic effects on CO <sub>2</sub> insertion reactivity.....     | S6 |
| Cartesian coordinates (Å) and energies of key optimized structures .....   | S8 |

### Comparison of hydrocarboxylation barriers using different functionals

The barriers of the CO<sub>2</sub> insertion with allylpalladium and benzylpalladium intermediates were calculated using M06L, M06 and B3LYP-D3 (Table S1). Although the absolute activation energies differ by a few kcal/mol among the methods tested, the trend of the CO<sub>2</sub> insertion reactivity, i.e. 11-TS with allylpalladium is lower than 14-TS and 15-TS with benzylpalladium, is only slightly affected by the choice of the density functional in single point calculations. Further, All these methods suggest that the Pd catalyst with Et-substituted *PGeP*-pincer ligand (15-TS) is more reactive than that with Ph-substituted ligand (14-TS).

**Table S1. Comparison of activation free energies ( $\Delta G_{\text{sol}}^{\ddagger}$  kcal/mol) of hydrocarboxylation transition states 11-TS, 14-TS and 15-TS**

| Method for single point energy calculation <sup>a</sup> | 11-TS<br>( $\Delta G_{\text{sol}}^{\ddagger}$ ) | 14-TS<br>( $\Delta G_{\text{sol}}^{\ddagger}$ ) | 15-TS<br>( $\Delta G_{\text{sol}}^{\ddagger}$ ) | $\Delta\Delta G_{\text{sol}}^{\ddagger}$<br>(14-TS-15-TS) |
|---------------------------------------------------------|-------------------------------------------------|-------------------------------------------------|-------------------------------------------------|-----------------------------------------------------------|
| M06L/SDD-6-311+G(d,p)/SMD                               | 21.6                                            | 34.8                                            | 28.4                                            | 6.4                                                       |
| B3LYP-D3/SDD-6-311+G(d,p)/SMD                           | 16.9                                            | 32.6                                            | 26.6                                            | 6.0                                                       |
| M06/SDD-6-311+G(d,p)/SMD                                | 20.8                                            | 36.4                                            | 31.2                                            | 5.2                                                       |

<sup>a</sup> Geometries were optimized at B3LYP/LANL2DZ-6-31G(d) level. The calculated  $\Delta G_{\text{sol}}^{\ddagger}$  are with respect to the corresponding allylpalladium and benzylpalladium intermediates.

## Energy profile of Pd-catalyzed styrene hydrocarboxylation

The energy profile for Ph-substituted *PGeP*-pincer Pd catalyzed (**cat1** shown in Scheme 1) styrene hydrocarboxylation with formate was shown in Fig. S1. Similar to the energy profile for allene hydrocarboxylation shown in Fig. 1 in the manuscript, the rate-determining step is CO<sub>2</sub> insertion into benzylpalladium intermediate (**S8**). The transition state (**14-TS**) has a quite high barrier, 34.8 kcal/mol with respect to **S8**. This is consistent with the experimental observation that **cat1** is ineffective to promote the styrene hydrocarboxylation.

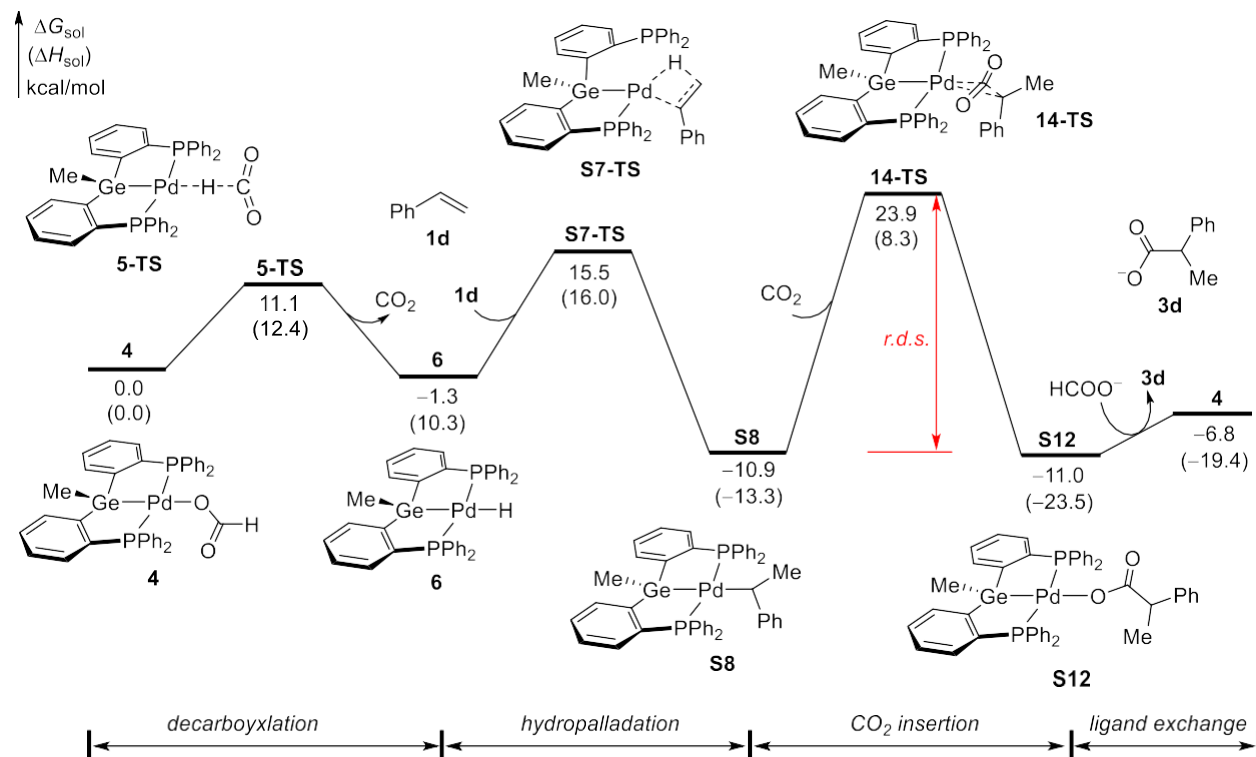

**Fig. S1** Energy profile of Ph-substituted *PGeP*-pincer Pd catalyzed hydrocarboxylation of styrene. Energies are with respect to the Pd formate **4**.

## Distortion/interaction analysis for 11-TS, 14-TS and 15-TS

As shown in Fig. S2, the trend of the total interaction energies of **11-TS**, **14-TS** and **15-TS** is not consistent with the trend of their activation energies. This indicates that the contribution of interaction energies is negative to the CO<sub>2</sub> insertion reactivity. For example, although the total interaction energy in **14-TS** is 6.4 kcal/mol larger than that in **15-TS**, the total distortion energy in **14-TS** is 10.3 kcal/mol higher than that in **15-TS**. Thus, the neat result suggests that the higher barrier of **14-TS** is attributed to the larger distortion energies.

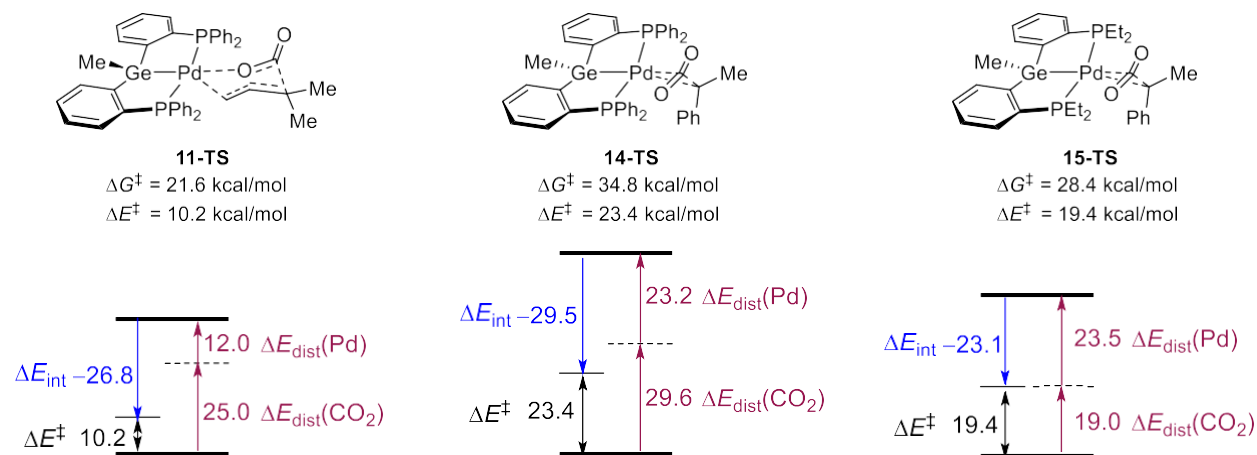

**Fig. S2** Distortion/interaction analysis for **11-TS**, **14-TS** and **15-TS**. Energies are given in kcal/mol.

## Disfavored conformers of CO<sub>2</sub> insertion transition states

For CO<sub>2</sub> insertion into the Pd–C(allyl) and Pd–C(benzyl) intermediates with the *PGeP*-pincer ligands, CO<sub>2</sub> can approach these Pd–C bonds from both sides of the pincer structure. We calculated both of these possibilities for CO<sub>2</sub> insertion. The transition states **11-TS**, **14-TS** and **15-TS** shown in Fig. 2 in the manuscript are favored over **11-TSa**, **14-TSa** and **15-TSa** shown in Fig. S3, respectively. The higher barriers of transition states **11-TSa**, **14-TSa** and **15-TSa** are due to the larger distortion energies ( $\Delta E_{\text{dist}}$ , Fig. S3) than those of **11-TS** ( $\Delta E_{\text{dist}} = 37.1$  kcal/mol), **14-TS** ( $\Delta E_{\text{dist}} = 52.8$  kcal/mol) and **15-TS** ( $\Delta E_{\text{dist}} = 42.5$  kcal/mol), respectively.

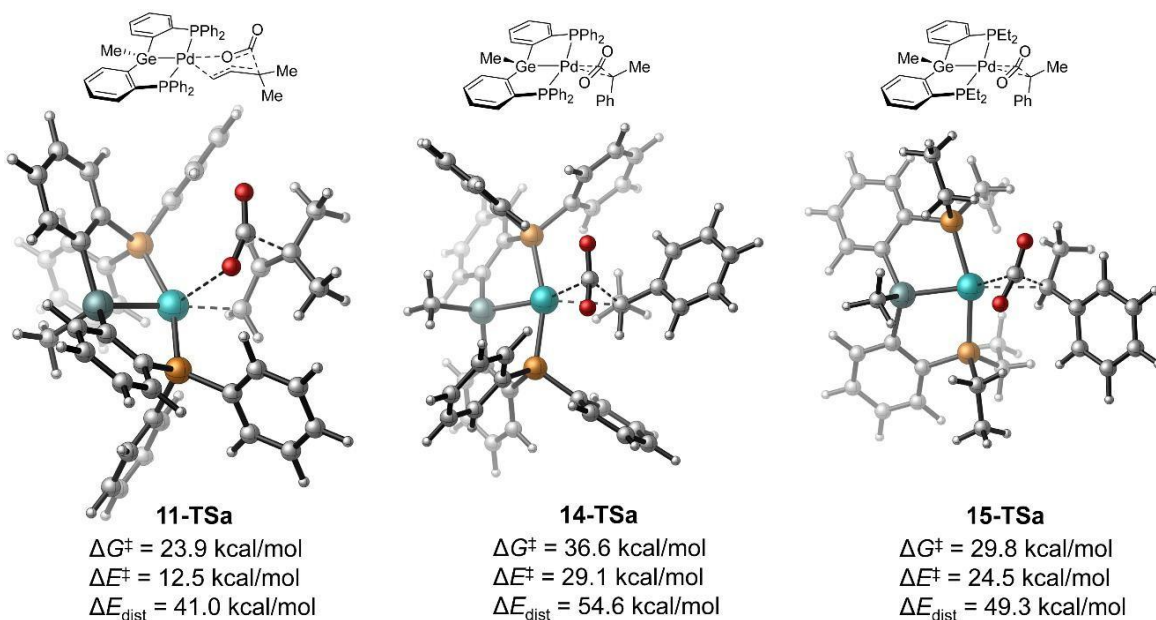

**Fig. S3** Disfavored CO<sub>2</sub> insertion transition states.

## Ligand electronic effects on CO<sub>2</sub> insertion reactivity

In the transition states of CO<sub>2</sub> insertion, the  $\gamma$ -C in allylpalladium **III** and the  $\alpha$ -C in benzylpalladium **IV** nucleophilically attack the central carbon of CO<sub>2</sub>. This nucleophilicity would be affected by the electron-donating ability of the different pincer ligands. Thus, we computed the NBO charges on the  $\gamma$ -C in allylpalladium **III** and the  $\alpha$ -C in benzylpalladium **IV** supported by pincer ligands with different *P*-bound R substituents (R = Ph, Me, Et, *i*Pr, Cy, *t*Bu). Poor and moderate correlations between the NBO charges and the activation energy were observed for allylpalladium **III** ( $R^2 = 0.42$ , Fig. S3) and benzylpalladium **IV** ( $R^2 = 0.81$ ), respectively. In contrast, as shown in Fig. 3 in the manuscript, the activation energy and the total distortion energy of CO<sub>2</sub> and Pd-allyl/Pd-benzyl complexes have excellent linear correlations ( $R^2 = 0.95$  for allylpalladium **III**;  $R^2 = 0.97$  for benzylpalladium **IV**). These results indicate that the reactivity of CO<sub>2</sub> insertion is dominated by the total distortion energy of CO<sub>2</sub> and Pd-allyl/Pd-benzyl intermediates.

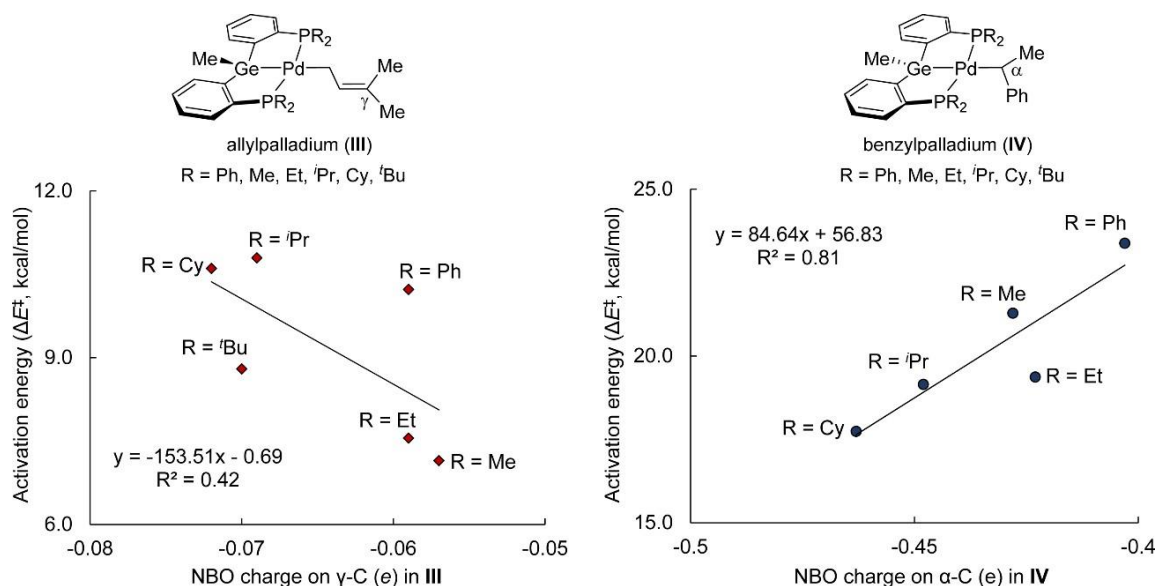

**Fig. S4** Relationships between NBO charges and activation energies of CO<sub>2</sub> insertion.

Previously, the Wu group did computational study on CO<sub>2</sub> insertion with *PSiP*-pincer Pd allyl complex (ref. 47 in the manuscript). They suggested that the *P*-bound Ph substituents lead to a lower activation energy than *P*-bound *i*Pr substituents due to electronic effects. To compare with Wu's results, we calculated the reaction of CO<sub>2</sub> with *PSiP*-pincer Pd allyl complex using our method. As shown in Fig. S4, the activation free energy of **TS1** is 20.2 kcal/mol, which is comparable with the number of the same transition state reported by Wu ( $\Delta G^\ddagger = 21.2$  kcal/mol). Also, the trend of reactivity between **TS1** and **TS2** is consistent with Wu's result, *i.e.* the *PSiP* pincer ligand with *P*-bound Ph substituents is more reactive than that with *i*Pr groups ( $\Delta G^\ddagger = 20.2$  kcal/mol for **TS1** vs  $\Delta G^\ddagger = 21.7$  kcal/mol for **TS2**). Based on the distortion/interaction

analysis, the disfavored **TS2** is mainly attributed to the larger total distortion energy of CO<sub>2</sub> and Pd-allyl fragments ( $\Delta E_{\text{dist}} = 35.7$  kcal/mol) compared to that of **TS1** ( $\Delta E_{\text{dist}} = 34.2$  kcal/mol). To study the ligand's electronic effect on CO<sub>2</sub> insertion reactivity, we calculated the NBO charges in **TS1**, **TS2** and Pd-allyl intermediates with Ph and *i*Pr substituents. The results show that the charge populations on the  $\gamma$ -carbon in **TS1** and **TS2** are opposite to the nature of nucleophilic addition to CO<sub>2</sub>. The  $\alpha$ -carbon has the same trend. Although the *PSiP*-pincer ligand with *i*Pr groups has stronger electron-donating ability, **TS2** obtains a higher barrier than **TS1** with the Ph substituted *PSiP*-pincer ligand. This indicates that the electron donicity of ligands exerts insignificant effects on the CO<sub>2</sub> insertion reactivity. The Pd-allyl intermediates with Ph and *i*Pr substituents give the same trend of charge populations with these transition states (not shown).

In addition, we compared the NBO charges in the CO<sub>2</sub> insertion transition states Ph- and *i*Pr-substituted *PGeP*-pincer ligands (**TSa-Ph** and **TSa-*i*Pr**, shown below). Although the charges on  $\gamma$ - and  $\alpha$ -carbon atoms in **TSa-*i*Pr** are more negative than those in **TSa-Ph**, these two transition states have comparable activation free energies of nucleophilic addition to CO<sub>2</sub>. In contrast, the total distortion energies in **TSa-Ph** and **TSa-*i*Pr** are comparable.

Taken together, the electronic effects of Ph and *i*Pr substituents are insignificant to the reactivity of CO<sub>2</sub> insertion. Instead, the distortions of CO<sub>2</sub> and Pd-allyl in the transition states show good consistence with the CO<sub>2</sub> insertion reactivity.

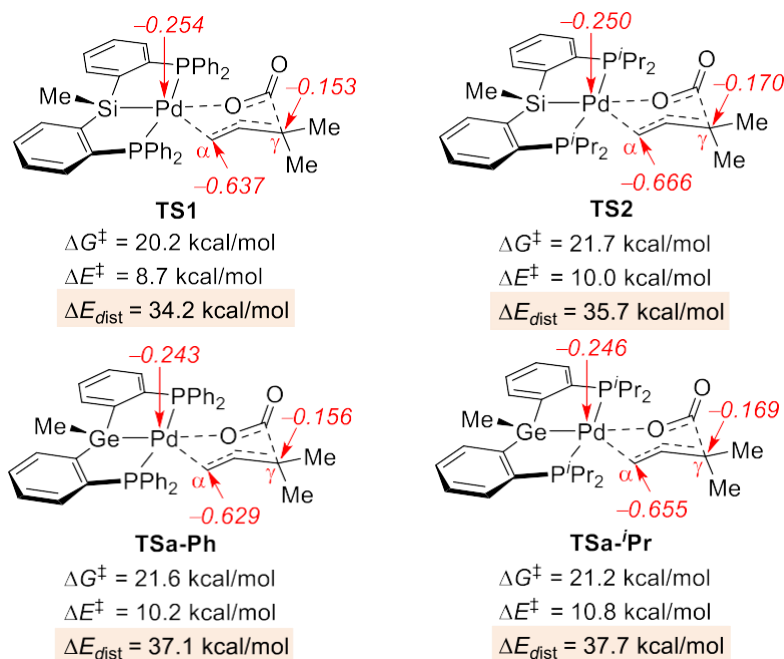

**Fig. S5** Charge populations in the CO<sub>2</sub> insertion transition states.

## Cartesian coordinates (Å) and energies of key optimized structures

1c  
B3LYP SCF energy: -195.29021278 a.u.  
B3LYP enthalpy: -195.169994 a.u.  
B3LYP free energy: -195.206460 a.u.  
M06 SCF energy in solution: -195.31534984 a.u.  
M06 enthalpy in solution: -195.195131 a.u.  
M06 free energy in solution: -195.231597 a.u.  
Three lowest frequencies (cm<sup>-1</sup>): 170.8162 183.7385 187.0846

### Cartesian coordinates

| ATOM | X         | Y         | Z         |
|------|-----------|-----------|-----------|
| C    | 0.934524  | -0.004028 | 0.067840  |
| C    | 2.240433  | -0.007061 | 0.148449  |
| H    | 2.870667  | -0.069243 | -0.738040 |
| H    | 2.757090  | 0.052590  | 1.105756  |
| C    | -0.374821 | -0.000758 | -0.013097 |
| C    | -1.177762 | -1.285158 | 0.021946  |
| H    | -0.533646 | -2.162669 | 0.121521  |
| H    | -1.884819 | -1.277183 | 0.862855  |
| H    | -1.773217 | -1.394914 | -0.894853 |
| C    | -1.160825 | 1.287691  | -0.146249 |
| H    | -1.758288 | 1.283616  | -1.068281 |
| H    | -1.864751 | 1.400251  | 0.689793  |
| H    | -0.504929 | 2.161936  | -0.164436 |

3c  
B3LYP SCF energy: -384.52269439 a.u.  
B3LYP enthalpy: -384.374416 a.u.  
B3LYP free energy: -384.417679 a.u.  
M06 SCF energy in solution: -384.69167233 a.u.  
M06 enthalpy in solution: -384.543394 a.u.  
M06 free energy in solution: -384.586657 a.u.  
Three lowest frequencies (cm<sup>-1</sup>): 45.9316 114.4858 227.8476

### Cartesian coordinates

| ATOM | X         | Y        | Z         |
|------|-----------|----------|-----------|
| C    | 2.687623  | 5.443121 | 0.611322  |
| H    | 3.718360  | 5.627639 | 0.310338  |
| H    | 2.425701  | 5.736819 | 1.625896  |
| C    | 1.811218  | 4.867101 | -0.222077 |
| C    | 0.374652  | 4.505990 | 0.036005  |
| C    | -0.053310 | 4.725215 | 1.487786  |
| H    | -1.083401 | 4.383305 | 1.622458  |
| H    | 0.012117  | 5.785552 | 1.780846  |
| H    | 0.568289  | 4.136446 | 2.170037  |
| C    | -0.514824 | 5.339687 | -0.915945 |
| H    | -0.251862 | 5.114407 | -1.953741 |
| H    | -0.404717 | 6.421263 | -0.740961 |
| H    | -1.571884 | 5.076565 | -0.772158 |
| H    | 2.138747  | 4.577882 | -1.220914 |
| C    | 0.178121  | 2.961079 | -0.413675 |
| O    | -0.347264 | 2.212486 | 0.439299  |



O 0.558639 2.719987 -1.585190

4

B3LYP SCF energy: -4502.04876041 a.u.  
B3LYP enthalpy: -4501.413908 a.u.  
B3LYP free energy: -4501.535166 a.u.  
M06 SCF energy in solution: -4505.71554801 a.u.  
M06 enthalpy in solution: -4505.080696 a.u.  
M06 free energy in solution: -4505.201954 a.u.  
Three lowest frequencies (cm-1): 12.9148 20.1952 35.9416

Cartesian coordinates

| ATOM | X         | Y         | Z         |
|------|-----------|-----------|-----------|
| Pd   | -0.000025 | 0.525536  | 0.130483  |
| P    | -2.334480 | 0.200947  | -0.009091 |
| P    | 2.334538  | 0.200955  | -0.009104 |
| C    | -2.721541 | -1.242078 | -1.104479 |
| C    | -3.200879 | -3.451597 | -2.746113 |
| C    | -3.973189 | -1.408106 | -1.714677 |
| C    | -1.689816 | -2.180686 | -1.316947 |
| C    | -1.956081 | -3.286689 | -2.133794 |
| C    | -4.210124 | -2.510576 | -2.537332 |
| H    | -4.755983 | -0.670318 | -1.565280 |
| H    | -1.183090 | -4.030759 | -2.310156 |
| H    | -5.177488 | -2.628649 | -3.018208 |
| H    | -3.379405 | -4.308297 | -3.391099 |
| C    | 2.721458  | -1.241905 | -1.104762 |
| C    | 3.200512  | -3.450950 | -2.747118 |
| C    | 1.689689  | -2.180445 | -1.317336 |
| C    | 3.973022  | -1.407796 | -1.715172 |
| C    | 4.209818  | -2.510035 | -2.538181 |
| C    | 1.955803  | -3.286193 | -2.134573 |
| H    | 4.755848  | -0.670066 | -1.565674 |
| H    | 5.177111  | -2.627995 | -3.019227 |
| H    | 1.182759  | -4.030173 | -2.311076 |
| H    | 3.378920  | -4.307452 | -3.392399 |
| Ge   | 0.000020  | -1.837790 | -0.338387 |
| C    | 0.000308  | -3.048065 | 1.235649  |
| H    | 0.889959  | -2.871782 | 1.847637  |
| H    | 0.000471  | -4.094833 | 0.910117  |
| H    | -0.889342 | -2.872087 | 1.847731  |
| C    | -3.003276 | -0.209841 | 1.655721  |
| C    | -3.910020 | -0.719298 | 4.259645  |
| C    | -3.845056 | -1.301129 | 1.910155  |
| C    | -2.609296 | 0.621767  | 2.719512  |
| C    | -3.068267 | 0.369146  | 4.011465  |
| C    | -4.294377 | -1.553762 | 3.209674  |
| H    | -4.147486 | -1.957091 | 1.099209  |
| H    | -1.938707 | 1.457254  | 2.529913  |
| H    | -2.760990 | 1.018070  | 4.827165  |
| H    | -4.944079 | -2.404513 | 3.397951  |
| H    | -4.259828 | -0.918245 | 5.269163  |
| C    | -3.422312 | 1.556623  | -0.609245 |
| C    | -5.069952 | 3.573713  | -1.642043 |
| C    | -4.748156 | 1.687255  | -0.162248 |

|   |           |           |           |
|---|-----------|-----------|-----------|
| C | -2.922342 | 2.454648  | -1.563820 |
| C | -3.748850 | 3.456574  | -2.076577 |
| C | -5.567660 | 2.690487  | -0.680708 |
| H | -5.138481 | 1.014390  | 0.595685  |
| H | -1.879612 | 2.410138  | -1.862081 |
| H | -3.347262 | 4.155873  | -2.804567 |
| H | -6.591303 | 2.785764  | -0.327883 |
| H | -5.707705 | 4.358794  | -2.040130 |
| C | 3.003316  | -0.210158 | 1.655635  |
| C | 3.910107  | -0.720089 | 4.259451  |
| C | 3.845221  | -1.301421 | 1.909833  |
| C | 2.609242  | 0.621154  | 2.719603  |
| C | 3.068232  | 0.368306  | 4.011511  |
| C | 4.294566  | -1.554282 | 3.209292  |
| H | 4.147715  | -1.957162 | 1.098732  |
| H | 1.938560  | 1.456611  | 2.530193  |
| H | 2.760862  | 1.017016  | 4.827345  |
| H | 4.944369  | -2.404993 | 3.397400  |
| H | 4.259940  | -0.919226 | 5.268923  |
| C | 3.422494  | 1.556671  | -0.608949 |
| C | 5.070222  | 3.573928  | -1.641284 |
| C | 2.922486  | 2.455094  | -1.563130 |
| C | 4.748432  | 1.686969  | -0.162123 |
| C | 5.567974  | 2.690286  | -0.680348 |
| C | 3.749043  | 3.457107  | -2.075657 |
| H | 1.879703  | 2.410829  | -1.861265 |
| H | 5.138789  | 1.013762  | 0.595491  |
| H | 6.591683  | 2.785318  | -0.327649 |
| H | 3.347426  | 4.156704  | -2.803345 |
| H | 5.708012  | 4.359083  | -2.039165 |
| C | -0.000338 | 3.519775  | 0.043779  |
| O | -0.000365 | 2.577272  | 0.914866  |
| O | -0.000089 | 3.417542  | -1.190886 |
| H | -0.000542 | 4.535245  | 0.497898  |

5-TS

|                                               |                            |        |         |
|-----------------------------------------------|----------------------------|--------|---------|
| B3LYP SCF energy:                             | -4502.01504026 a.u.        |        |         |
| B3LYP enthalpy:                               | -4501.385795 a.u.          |        |         |
| B3LYP free energy:                            | -4501.509151 a.u.          |        |         |
| M06 SCF energy in solution:                   | -4505.69012816 a.u.        |        |         |
| M06 enthalpy in solution:                     | -4505.060883 a.u.          |        |         |
| M06 free energy in solution:                  | -4505.184239 a.u.          |        |         |
| Three lowest frequencies (cm <sup>-1</sup> ): | -244.5253                  | 9.2269 | 17.3338 |
| Imaginary frequency:                          | -244.5253 cm <sup>-1</sup> |        |         |

Cartesian coordinates

| ATOM | X         | Y         | Z         |
|------|-----------|-----------|-----------|
| Pd   | -0.006837 | 0.454814  | 0.128251  |
| P    | -2.331096 | 0.216984  | -0.041102 |
| P    | 2.296543  | 0.102856  | -0.043314 |
| C    | -2.684511 | -1.237159 | -1.138093 |
| C    | -3.141230 | -3.497303 | -2.717556 |
| C    | -3.854574 | -1.337718 | -1.904018 |
| C    | -1.715910 | -2.265788 | -1.165983 |
| C    | -1.975547 | -3.394153 | -1.954147 |

|    |           |           |           |
|----|-----------|-----------|-----------|
| C  | -4.079721 | -2.465329 | -2.696089 |
| H  | -4.583349 | -0.532879 | -1.898659 |
| H  | -1.252655 | -4.205545 | -1.991309 |
| H  | -4.982747 | -2.532338 | -3.297024 |
| H  | -3.310698 | -4.376002 | -3.334885 |
| C  | 2.631458  | -1.476471 | -0.955793 |
| C  | 3.084209  | -3.910257 | -2.252869 |
| C  | 1.604780  | -2.444483 | -0.980147 |
| C  | 3.859660  | -1.721746 | -1.588601 |
| C  | 4.083146  | -2.935285 | -2.239755 |
| C  | 1.862593  | -3.663197 | -1.623296 |
| H  | 4.636809  | -0.963165 | -1.585623 |
| H  | 5.032778  | -3.116391 | -2.736176 |
| H  | 1.097395  | -4.435665 | -1.645754 |
| H  | 3.253614  | -4.857591 | -2.758621 |
| Ge | -0.091816 | -1.986208 | -0.048971 |
| C  | -0.228522 | -3.174931 | 1.534996  |
| H  | 0.628226  | -3.011203 | 2.195546  |
| H  | -0.240259 | -4.228152 | 1.231643  |
| H  | -1.146201 | -2.960038 | 2.089969  |
| C  | -3.152993 | -0.169112 | 1.563292  |
| C  | -4.330933 | -0.651749 | 4.064545  |
| C  | -4.089631 | -1.201008 | 1.718485  |
| C  | -2.804135 | 0.613257  | 2.677542  |
| C  | -3.394928 | 0.375817  | 3.917732  |
| C  | -4.674424 | -1.439493 | 2.965411  |
| H  | -4.360471 | -1.822587 | 0.870384  |
| H  | -2.066676 | 1.405090  | 2.571947  |
| H  | -3.118046 | 0.988664  | 4.771188  |
| H  | -5.397365 | -2.243680 | 3.074585  |
| H  | -4.785673 | -0.840087 | 5.033390  |
| C  | -3.313618 | 1.620173  | -0.713408 |
| C  | -4.750191 | 3.771949  | -1.794397 |
| C  | -4.699421 | 1.726024  | -0.503706 |
| C  | -2.652999 | 2.614200  | -1.449655 |
| C  | -3.371319 | 3.683016  | -1.989154 |
| C  | -5.412817 | 2.794594  | -1.046950 |
| H  | -5.219479 | 0.984907  | 0.096822  |
| H  | -1.574816 | 2.577113  | -1.564241 |
| H  | -2.843807 | 4.454096  | -2.543159 |
| H  | -6.483728 | 2.869366  | -0.877161 |
| H  | -5.306622 | 4.608436  | -2.209011 |
| C  | 3.114571  | -0.069830 | 1.596752  |
| C  | 4.261405  | -0.236555 | 4.149998  |
| C  | 3.912405  | -1.169192 | 1.943452  |
| C  | 2.887251  | 0.946251  | 2.543087  |
| C  | 3.465375  | 0.860834  | 3.809166  |
| C  | 4.482114  | -1.250145 | 3.217222  |
| H  | 4.090226  | -1.962991 | 1.224693  |
| H  | 2.261535  | 1.799623  | 2.291412  |
| H  | 3.287005  | 1.651966  | 4.532368  |
| H  | 5.097495  | -2.107636 | 3.476822  |
| H  | 4.704485  | -0.301808 | 5.140283  |
| C  | 3.288902  | 1.381915  | -0.918106 |
| C  | 4.749924  | 3.304079  | -2.343545 |
| C  | 2.664612  | 2.159311  | -1.904620 |
| C  | 4.649530  | 1.588867  | -0.639713 |

|   |          |          |           |
|---|----------|----------|-----------|
| C | 5.375307 | 2.544704 | -1.352252 |
| C | 3.394181 | 3.112314 | -2.616053 |
| H | 1.601788 | 2.039319 | -2.090745 |
| H | 5.138537 | 1.015037 | 0.142194  |
| H | 6.426636 | 2.701450 | -1.125845 |
| H | 2.896802 | 3.716486 | -3.369408 |
| H | 5.314846 | 4.053181 | -2.891922 |
| H | 0.071867 | 2.164572 | 0.143091  |
| C | 0.433021 | 3.649982 | 0.445509  |
| O | 0.855570 | 3.660594 | 1.568626  |
| O | 0.149602 | 4.225628 | -0.567217 |

6

|                                               |                     |         |         |
|-----------------------------------------------|---------------------|---------|---------|
| B3LYP SCF energy:                             | -4313.44181517 a.u. |         |         |
| B3LYP enthalpy:                               | -4312.827934 a.u.   |         |         |
| B3LYP free energy:                            | -4312.943329 a.u.   |         |         |
| M06 SCF energy in solution:                   | -4317.06042199 a.u. |         |         |
| M06 enthalpy in solution:                     | -4316.446541 a.u.   |         |         |
| M06 free energy in solution:                  | -4316.561936 a.u.   |         |         |
| Three lowest frequencies (cm <sup>-1</sup> ): | 9.7308              | 17.3538 | 21.2248 |

Cartesian coordinates

| ATOM | X         | Y         | Z         |
|------|-----------|-----------|-----------|
| Pd   | 0.006275  | 0.625080  | 0.373423  |
| P    | -2.292990 | 0.409322  | 0.104073  |
| P    | 2.298977  | 0.391988  | 0.112890  |
| C    | -2.602611 | -0.702774 | -1.352305 |
| C    | -2.994801 | -2.441002 | -3.505698 |
| C    | -3.755051 | -0.596024 | -2.145317 |
| C    | -1.620688 | -1.680248 | -1.634780 |
| C    | -1.849743 | -2.545920 | -2.712329 |
| C    | -3.948293 | -1.462300 | -3.222909 |
| H    | -4.496432 | 0.169092  | -1.935012 |
| H    | -1.115699 | -3.311808 | -2.951976 |
| H    | -4.837883 | -1.367536 | -3.840243 |
| H    | -3.138755 | -3.115670 | -4.346277 |
| C    | 2.673461  | -0.893064 | -1.177098 |
| C    | 3.200493  | -2.898730 | -3.051680 |
| C    | 1.681911  | -1.863419 | -1.440992 |
| C    | 3.900001  | -0.918965 | -1.859909 |
| C    | 4.161151  | -1.918192 | -2.798023 |
| C    | 1.980256  | -2.867163 | -2.373872 |
| H    | 4.648433  | -0.155112 | -1.669889 |
| H    | 5.109777  | -1.928454 | -3.328501 |
| H    | 1.244594  | -3.639700 | -2.586817 |
| H    | 3.398699  | -3.680586 | -3.780950 |
| Ge   | -0.029808 | -1.719163 | -0.422052 |
| C    | -0.189109 | -3.394929 | 0.641117  |
| H    | 0.651954  | -3.480597 | 1.336102  |
| H    | -0.194917 | -4.277878 | -0.008699 |
| H    | -1.118414 | -3.382827 | 1.218995  |
| C    | -3.136638 | -0.406162 | 1.528554  |
| C    | -4.332244 | -1.583443 | 3.780609  |
| C    | -4.008169 | -1.494714 | 1.382285  |
| C    | -2.863794 | 0.081639  | 2.818041  |

|   |           |           |           |
|---|-----------|-----------|-----------|
| C | -3.462455 | -0.500085 | 3.934509  |
| C | -4.601366 | -2.079606 | 2.504849  |
| H | -4.220268 | -1.891024 | 0.394064  |
| H | -2.175506 | 0.913634  | 2.942936  |
| H | -3.243665 | -0.112777 | 4.926088  |
| H | -5.272428 | -2.925249 | 2.378417  |
| H | -4.792854 | -2.040908 | 4.652199  |
| C | -3.328238 | 1.905376  | -0.206842 |
| C | -4.838353 | 4.203732  | -0.769081 |
| C | -4.702345 | 1.941664  | 0.080207  |
| C | -2.717557 | 3.038339  | -0.762993 |
| C | -3.470474 | 4.177884  | -1.049045 |
| C | -5.451920 | 3.085764  | -0.200010 |
| H | -5.186660 | 1.081557  | 0.533777  |
| H | -1.646012 | 3.026912  | -0.940726 |
| H | -2.984990 | 5.050419  | -1.478232 |
| H | -6.513597 | 3.104538  | 0.032220  |
| H | -5.422307 | 5.095085  | -0.983190 |
| C | 3.142393  | -0.184114 | 1.648044  |
| C | 4.332607  | -0.979131 | 4.063732  |
| C | 4.042741  | -1.258396 | 1.675780  |
| C | 2.835427  | 0.482018  | 2.847428  |
| C | 3.432016  | 0.089694  | 4.044740  |
| C | 4.633400  | -1.652676 | 2.879657  |
| H | 4.279453  | -1.792843 | 0.761139  |
| H | 2.121939  | 1.301979  | 2.836713  |
| H | 3.187661  | 0.613586  | 4.965032  |
| H | 5.327249  | -2.489279 | 2.888668  |
| H | 4.791983  | -1.288398 | 4.998880  |
| C | 3.283795  | 1.862324  | -0.409363 |
| C | 4.715785  | 4.098287  | -1.319189 |
| C | 2.656354  | 2.833690  | -1.203130 |
| C | 4.633054  | 2.031420  | -0.062530 |
| C | 5.343789  | 3.145265  | -0.515377 |
| C | 3.370692  | 3.940421  | -1.661684 |
| H | 1.600769  | 2.726713  | -1.436378 |
| H | 5.128135  | 1.299964  | 0.569707  |
| H | 6.386694  | 3.268936  | -0.235226 |
| H | 2.873152  | 4.686326  | -2.275890 |
| H | 5.269402  | 4.965696  | -1.669026 |
| H | 0.043053  | 2.237381  | 0.733470  |

7-TS

|                                  |                |         |                     |
|----------------------------------|----------------|---------|---------------------|
| B3LYP SCF energy:                |                |         | -4508.71538958 a.u. |
| B3LYP enthalpy:                  |                |         | -4507.981456 a.u.   |
| B3LYP free energy:               |                |         | -4508.111353 a.u.   |
| M06 SCF energy in solution:      |                |         | -4512.37524883 a.u. |
| M06 enthalpy in solution:        |                |         | -4511.641315 a.u.   |
| M06 free energy in solution:     |                |         | -4511.771212 a.u.   |
| Three lowest frequencies (cm-1): | -808.7685      | 11.4705 | 21.7615             |
| Imaginary frequency:             | -808.7685 cm-1 |         |                     |

Cartesian coordinates

| ATOM | X        | Y        | Z        |
|------|----------|----------|----------|
| Pd   | 0.098606 | 1.042141 | 0.256037 |

|    |           |           |           |
|----|-----------|-----------|-----------|
| P  | 1.949362  | -0.530045 | 0.242707  |
| P  | -2.194280 | -0.021442 | 0.278860  |
| C  | 1.888972  | -1.586844 | -1.276855 |
| C  | 1.782322  | -3.086335 | -3.632915 |
| C  | 2.613494  | -2.784494 | -1.386267 |
| C  | 1.089385  | -1.130703 | -2.343694 |
| C  | 1.060960  | -1.897078 | -3.518710 |
| C  | 2.558446  | -3.533649 | -2.561103 |
| H  | 3.215021  | -3.137107 | -0.553370 |
| H  | 0.448896  | -1.572363 | -4.357645 |
| H  | 3.116925  | -4.463101 | -2.638039 |
| H  | 1.732965  | -3.667816 | -4.550567 |
| C  | -2.768966 | -0.212926 | -1.481024 |
| C  | -3.640191 | -0.430532 | -4.132716 |
| C  | -1.857888 | 0.042140  | -2.525791 |
| C  | -4.094997 | -0.576224 | -1.768984 |
| C  | -4.530451 | -0.688227 | -3.087920 |
| C  | -2.323920 | -0.069069 | -3.846494 |
| H  | -4.795976 | -0.763079 | -0.960546 |
| H  | -5.560309 | -0.965332 | -3.298241 |
| H  | -1.647054 | 0.138755  | -4.672267 |
| H  | -3.973187 | -0.504982 | -5.165275 |
| Ge | 0.028324  | 0.553536  | -2.127826 |
| C  | 0.606254  | 1.767285  | -3.591747 |
| H  | 0.559924  | 1.278186  | -4.571787 |
| H  | 1.639460  | 2.084399  | -3.419341 |
| H  | -0.030607 | 2.657122  | -3.616132 |
| C  | 3.561658  | 0.367377  | 0.101578  |
| C  | 5.928988  | 1.883281  | -0.058829 |
| C  | 4.371706  | 0.308864  | -1.041566 |
| C  | 3.954236  | 1.202323  | 1.162829  |
| C  | 5.129730  | 1.947107  | 1.086684  |
| C  | 5.545222  | 1.064605  | -1.120595 |
| H  | 4.089786  | -0.328075 | -1.873702 |
| H  | 3.336237  | 1.270270  | 2.053870  |
| H  | 5.420556  | 2.581110  | 1.920489  |
| H  | 6.160445  | 1.006637  | -2.014945 |
| H  | 6.842928  | 2.468144  | -0.120813 |
| C  | 2.281444  | -1.713795 | 1.625402  |
| C  | 2.646302  | -3.548515 | 3.724517  |
| C  | 3.571061  | -2.137398 | 1.987937  |
| C  | 1.180580  | -2.213840 | 2.337358  |
| C  | 1.361022  | -3.130538 | 3.374055  |
| C  | 3.750485  | -3.047895 | 3.031135  |
| H  | 4.437941  | -1.749597 | 1.461426  |
| H  | 0.179750  | -1.879674 | 2.081991  |
| H  | 0.494374  | -3.510916 | 3.907809  |
| H  | 4.754477  | -3.364489 | 3.302350  |
| H  | 2.788442  | -4.256099 | 4.537326  |
| C  | -3.543325 | 1.001400  | 1.039205  |
| C  | -5.531011 | 2.692680  | 2.098608  |
| C  | -4.737942 | 0.470477  | 1.553887  |
| C  | -3.360506 | 2.393722  | 1.071010  |
| C  | -4.347987 | 3.232370  | 1.591104  |
| C  | -5.721631 | 1.309505  | 2.080388  |
| H  | -4.899828 | -0.602989 | 1.555531  |
| H  | -2.436463 | 2.816447  | 0.686481  |

|   |           |           |           |
|---|-----------|-----------|-----------|
| H | -4.187592 | 4.307302  | 1.604949  |
| H | -6.638788 | 0.880021  | 2.475669  |
| H | -6.297839 | 3.344211  | 2.509389  |
| C | -2.482185 | -1.695431 | 1.009997  |
| C | -2.670708 | -4.248125 | 2.195643  |
| C | -2.461177 | -2.857775 | 0.222369  |
| C | -2.582083 | -1.837471 | 2.406933  |
| C | -2.686229 | -3.099591 | 2.992155  |
| C | -2.552491 | -4.121102 | 0.811224  |
| H | -2.376817 | -2.777593 | -0.856731 |
| H | -2.589677 | -0.954883 | 3.041173  |
| H | -2.780893 | -3.184788 | 4.071928  |
| H | -2.535703 | -5.007038 | 0.181751  |
| H | -2.749170 | -5.231535 | 2.651349  |
| C | 0.186213  | 1.994736  | 2.299969  |
| H | 0.907655  | 1.466930  | 2.919913  |
| H | -0.831589 | 2.033442  | 2.681974  |
| C | 0.627100  | 2.909487  | 1.347177  |
| C | 1.318565  | 4.025837  | 1.119198  |
| C | 1.736630  | 4.894209  | 2.289184  |
| H | 1.327731  | 5.909493  | 2.187823  |
| H | 2.830575  | 4.997660  | 2.321177  |
| H | 1.399764  | 4.479770  | 3.242919  |
| C | 1.735328  | 4.517181  | -0.241380 |
| H | 1.311281  | 3.899196  | -1.036157 |
| H | 2.829570  | 4.493241  | -0.339504 |
| H | 1.424860  | 5.560484  | -0.393441 |
| H | -0.241026 | 2.607148  | -0.127305 |

8

|                                               |                     |         |         |
|-----------------------------------------------|---------------------|---------|---------|
| B3LYP SCF energy:                             | -4508.78177436 a.u. |         |         |
| B3LYP enthalpy:                               | -4508.040902 a.u.   |         |         |
| B3LYP free energy:                            | -4508.172632 a.u.   |         |         |
| M06 SCF energy in solution:                   | -4512.43633202 a.u. |         |         |
| M06 enthalpy in solution:                     | -4511.695460 a.u.   |         |         |
| M06 free energy in solution:                  | -4511.827190 a.u.   |         |         |
| Three lowest frequencies (cm <sup>-1</sup> ): | 11.1669             | 13.3926 | 19.2533 |

#### Cartesian coordinates

| ATOM | X         | Y         | Z         |
|------|-----------|-----------|-----------|
| Pd   | 0.008808  | 0.362628  | 0.171744  |
| P    | 2.331296  | 0.027270  | 0.212415  |
| P    | -2.285033 | -0.079363 | 0.205687  |
| C    | 2.682703  | -1.761099 | 0.550808  |
| C    | 3.179445  | -4.481077 | 0.930865  |
| C    | 3.870262  | -2.180546 | 1.170013  |
| C    | 1.717529  | -2.697628 | 0.122200  |
| C    | 1.999824  | -4.057229 | 0.314229  |
| C    | 4.115584  | -3.540606 | 1.363787  |
| H    | 4.597558  | -1.448641 | 1.510334  |
| H    | 1.283976  | -4.807967 | -0.011966 |
| H    | 5.032158  | -3.862254 | 1.851552  |
| H    | 3.365030  | -5.542265 | 1.078943  |
| C    | -2.574523 | -1.886925 | 0.500254  |
| C    | -2.974385 | -4.631611 | 0.810773  |

|    |           |           |           |
|----|-----------|-----------|-----------|
| C  | -1.566899 | -2.776483 | 0.070441  |
| C  | -3.754974 | -2.364287 | 1.090277  |
| C  | -3.951698 | -3.736764 | 1.249384  |
| C  | -1.801342 | -4.149933 | 0.224854  |
| H  | -4.515461 | -1.668412 | 1.433503  |
| H  | -4.863143 | -4.103516 | 1.714406  |
| H  | -1.053088 | -4.865654 | -0.107599 |
| H  | -3.122764 | -5.702133 | 0.931002  |
| Ge | 0.068787  | -1.955686 | -0.735101 |
| C  | 0.112411  | -2.547438 | -2.636066 |
| H  | 0.138438  | -3.640344 | -2.714999 |
| H  | 0.999578  | -2.142244 | -3.132959 |
| H  | -0.776694 | -2.182637 | -3.160168 |
| C  | 3.165158  | 0.370369  | -1.399586 |
| C  | 4.359459  | 0.963123  | -3.871879 |
| C  | 4.319176  | -0.312611 | -1.814975 |
| C  | 2.611096  | 1.346624  | -2.243204 |
| C  | 3.208872  | 1.643892  | -3.469172 |
| C  | 4.911550  | -0.016686 | -3.043921 |
| H  | 4.750317  | -1.085085 | -1.185362 |
| H  | 1.709005  | 1.869269  | -1.937779 |
| H  | 2.769734  | 2.402396  | -4.111663 |
| H  | 5.801925  | -0.556363 | -3.355877 |
| H  | 4.820434  | 1.189803  | -4.829662 |
| C  | 3.354085  | 0.924222  | 1.459738  |
| C  | 4.778674  | 2.304922  | 3.451623  |
| C  | 4.452262  | 1.727694  | 1.122271  |
| C  | 2.971055  | 0.831376  | 2.809539  |
| C  | 3.682809  | 1.508998  | 3.797670  |
| C  | 5.158276  | 2.414466  | 2.114059  |
| H  | 4.761538  | 1.817390  | 0.085995  |
| H  | 2.110965  | 0.225614  | 3.084206  |
| H  | 3.377069  | 1.423245  | 4.837011  |
| H  | 6.007153  | 3.033964  | 1.836608  |
| H  | 5.328896  | 2.839700  | 4.221176  |
| C  | -3.097392 | 0.268738  | -1.414240 |
| C  | -4.242267 | 0.880005  | -3.903946 |
| C  | -4.189585 | -0.469774 | -1.895152 |
| C  | -2.577066 | 1.309152  | -2.201203 |
| C  | -3.150669 | 1.615042  | -3.436159 |
| C  | -4.758382 | -0.163641 | -3.133264 |
| H  | -4.589402 | -1.292592 | -1.310162 |
| H  | -1.717369 | 1.870384  | -1.844921 |
| H  | -2.738897 | 2.422388  | -4.035869 |
| H  | -5.601280 | -0.745483 | -3.497010 |
| H  | -4.684003 | 1.114177  | -4.868976 |
| C  | -3.360260 | 0.744752  | 1.459505  |
| C  | -4.891660 | 1.965427  | 3.475753  |
| C  | -2.896466 | 0.785230  | 2.785662  |
| C  | -4.593933 | 1.338089  | 1.155310  |
| C  | -5.353651 | 1.944838  | 2.159639  |
| C  | -3.659907 | 1.382794  | 3.786995  |
| H  | -1.928279 | 0.354497  | 3.028518  |
| H  | -4.965716 | 1.329030  | 0.135615  |
| H  | -6.307332 | 2.401933  | 1.908795  |
| H  | -3.288550 | 1.403680  | 4.808103  |
| H  | -5.483291 | 2.439153  | 4.254576  |



|   |           |          |           |
|---|-----------|----------|-----------|
| C | -0.037682 | 2.314135 | 1.160451  |
| H | 0.669326  | 2.207455 | 1.988736  |
| H | -1.037661 | 2.488824 | 1.559499  |
| C | 0.409340  | 3.329830 | 0.192543  |
| C | -0.307961 | 4.247868 | -0.501412 |
| C | -1.795443 | 4.451083 | -0.350651 |
| H | -2.319532 | 4.339391 | -1.311826 |
| H | -2.015551 | 5.472046 | -0.001838 |
| H | -2.250497 | 3.753887 | 0.357353  |
| C | 0.365541  | 5.197717 | -1.462794 |
| H | 1.445186  | 5.019672 | -1.522871 |
| H | 0.215572  | 6.247367 | -1.165104 |
| H | -0.046336 | 5.111488 | -2.480966 |
| H | 1.486865  | 3.335016 | 0.007041  |

9-TS

|                                  |                     |                |
|----------------------------------|---------------------|----------------|
| B3LYP SCF energy:                | -4508.70230095 a.u. |                |
| B3LYP enthalpy:                  | -4507.968244 a.u.   |                |
| B3LYP free energy:               | -4508.096957 a.u.   |                |
| M06 SCF energy in solution:      | -4512.36495838 a.u. |                |
| M06 enthalpy in solution:        | -4511.630901 a.u.   |                |
| M06 free energy in solution:     | -4511.759614 a.u.   |                |
| Three lowest frequencies (cm-1): | -820.1305           | 7.0119 14.9013 |
| Imaginary frequency:             | -820.1305 cm-1      |                |

Cartesian coordinates

| ATOM | X         | Y         | Z         |
|------|-----------|-----------|-----------|
| Pd   | 0.039350  | -0.093290 | 1.325529  |
| P    | -2.076816 | 0.242458  | -0.043564 |
| P    | 2.042584  | 0.220472  | -0.126474 |
| C    | -2.050263 | -0.981529 | -1.440925 |
| C    | -2.061230 | -2.947132 | -3.434901 |
| C    | -2.877497 | -0.848142 | -2.568847 |
| C    | -1.210545 | -2.104665 | -1.302799 |
| C    | -1.240868 | -3.077789 | -2.314684 |
| C    | -2.880792 | -1.823604 | -3.563984 |
| H    | -3.513276 | 0.025482  | -2.680001 |
| H    | -0.596042 | -3.950897 | -2.237421 |
| H    | -3.520888 | -1.707157 | -4.435001 |
| H    | -2.058137 | -3.713401 | -4.206555 |
| C    | 2.620174  | -1.423883 | -0.777841 |
| C    | 3.511970  | -3.930839 | -1.638206 |
| C    | 1.799684  | -2.549016 | -0.578028 |
| C    | 3.865954  | -1.554118 | -1.412816 |
| C    | 4.309978  | -2.802990 | -1.844622 |
| C    | 2.272226  | -3.797729 | -1.012104 |
| H    | 4.499654  | -0.683450 | -1.556637 |
| H    | 5.279398  | -2.896796 | -2.327318 |
| H    | 1.664684  | -4.686061 | -0.853726 |
| H    | 3.858422  | -4.910312 | -1.959511 |
| Ge   | 0.017494  | -2.299295 | 0.269400  |
| C    | -0.469700 | -4.014338 | 1.144578  |
| H    | -0.495889 | -4.843464 | 0.427894  |
| H    | -1.462052 | -3.925312 | 1.597145  |
| H    | 0.250587  | -4.255335 | 1.932702  |

|   |           |           |           |
|---|-----------|-----------|-----------|
| C | -3.654439 | -0.244299 | 0.819133  |
| C | -5.988144 | -1.112904 | 2.135980  |
| C | -4.918366 | -0.079346 | 0.226436  |
| C | -3.582762 | -0.854534 | 2.079416  |
| C | -4.740278 | -1.287074 | 2.733146  |
| C | -6.073768 | -0.506583 | 0.879475  |
| H | -5.004327 | 0.391160  | -0.748046 |
| H | -2.611963 | -0.994714 | 2.545067  |
| H | -4.661795 | -1.757729 | 3.709807  |
| H | -7.042283 | -0.368899 | 0.405371  |
| H | -6.889588 | -1.446696 | 2.643263  |
| C | -2.525153 | 1.851900  | -0.833407 |
| C | -2.985214 | 4.417288  | -1.915016 |
| C | -3.381837 | 2.764112  | -0.191113 |
| C | -1.888397 | 2.258974  | -2.019088 |
| C | -2.123731 | 3.524727  | -2.556514 |
| C | -3.609483 | 4.032862  | -0.727564 |
| H | -3.886881 | 2.479104  | 0.726291  |
| H | -1.207396 | 1.585734  | -2.530985 |
| H | -1.624926 | 3.811832  | -3.478048 |
| H | -4.281386 | 4.717776  | -0.216424 |
| H | -3.166471 | 5.402985  | -2.335445 |
| C | 3.595596  | 0.840607  | 0.679037  |
| C | 5.963439  | 1.592586  | 2.002944  |
| C | 4.539548  | 1.663305  | 0.044559  |
| C | 3.855408  | 0.403359  | 1.989126  |
| C | 5.031378  | 0.772700  | 2.642839  |
| C | 5.712754  | 2.037660  | 0.704225  |
| H | 4.362442  | 2.018083  | -0.965692 |
| H | 3.124383  | -0.214911 | 2.501101  |
| H | 5.214538  | 0.425018  | 3.656199  |
| H | 6.432004  | 2.676537  | 0.197950  |
| H | 6.877022  | 1.884935  | 2.513911  |
| C | 1.901693  | 1.272756  | -1.641293 |
| C | 1.541669  | 2.927267  | -3.892671 |
| C | 1.780566  | 0.718705  | -2.924944 |
| C | 1.815139  | 2.669555  | -1.501639 |
| C | 1.649452  | 3.489109  | -2.617178 |
| C | 1.597655  | 1.540813  | -4.040567 |
| H | 1.832830  | -0.356915 | -3.057260 |
| H | 1.886830  | 3.119976  | -0.515348 |
| H | 1.597990  | 4.567107  | -2.489132 |
| H | 1.508735  | 1.092739  | -5.026874 |
| H | 1.413043  | 3.566063  | -4.762607 |
| C | -0.023376 | 1.671865  | 2.854233  |
| C | 0.386457  | 0.473591  | 3.440395  |
| C | 0.976266  | -0.062961 | 4.504472  |
| H | -0.367986 | -0.860040 | 2.713893  |
| H | 1.233927  | -1.115871 | 4.563553  |
| H | 1.209457  | 0.556684  | 5.370780  |
| C | -1.441382 | 2.169465  | 3.069881  |
| H | -2.150809 | 1.351132  | 3.211833  |
| H | -1.778799 | 2.779642  | 2.225196  |
| H | -1.477797 | 2.806840  | 3.969304  |
| C | 0.993185  | 2.769379  | 2.599120  |
| H | 1.040265  | 3.443254  | 3.471264  |
| H | 0.703173  | 3.382937  | 1.737767  |

H 1.995085 2.373145 2.427694

10

B3LYP SCF energy: -4508.75539924 a.u.  
B3LYP enthalpy: -4508.014793 a.u.  
B3LYP free energy: -4508.142652 a.u.  
M06 SCF energy in solution: -4512.42084694 a.u.  
M06 enthalpy in solution: -4511.680241 a.u.  
M06 free energy in solution: -4511.808100 a.u.  
Three lowest frequencies (cm-1): 10.0344 13.0293 26.6662

Cartesian coordinates

| ATOM | X         | Y         | Z         |
|------|-----------|-----------|-----------|
| Pd   | -0.031090 | 0.497327  | 0.295227  |
| P    | -2.360581 | 0.198932  | -0.025559 |
| P    | 2.290840  | 0.079151  | -0.061231 |
| C    | -2.695198 | -1.253196 | -1.138404 |
| C    | -3.190758 | -3.543160 | -2.658418 |
| C    | -3.877766 | -1.360717 | -1.887828 |
| C    | -1.736791 | -2.284583 | -1.152807 |
| C    | -2.015965 | -3.429438 | -1.913027 |
| C    | -4.122050 | -2.503086 | -2.649941 |
| H    | -4.601429 | -0.550909 | -1.891248 |
| H    | -1.302340 | -4.249289 | -1.936349 |
| H    | -5.034711 | -2.578434 | -3.235525 |
| H    | -3.376631 | -4.436702 | -3.249545 |
| C    | 2.530469  | -1.411641 | -1.151639 |
| C    | 2.895475  | -3.763005 | -2.619173 |
| C    | 1.517317  | -2.389190 | -1.143547 |
| C    | 3.702899  | -1.603914 | -1.900802 |
| C    | 3.881795  | -2.775073 | -2.636552 |
| C    | 1.730832  | -3.566272 | -1.875747 |
| H    | 4.470557  | -0.836442 | -1.923906 |
| H    | 4.787866  | -2.914161 | -3.220751 |
| H    | 0.973678  | -4.346611 | -1.876681 |
| H    | 3.031117  | -4.679805 | -3.187949 |
| Ge   | -0.100314 | -1.984246 | -0.058631 |
| C    | -0.147640 | -3.337662 | 1.403537  |
| H    | -0.174014 | -4.356009 | 0.998656  |
| H    | -1.035438 | -3.189199 | 2.026414  |
| H    | 0.741789  | -3.238431 | 2.033635  |
| C    | -3.270047 | -0.240536 | 1.523620  |
| C    | -4.542335 | -0.938112 | 3.930414  |
| C    | -4.579783 | -0.748179 | 1.517680  |
| C    | -2.604556 | -0.102192 | 2.750354  |
| C    | -3.236723 | -0.446476 | 3.947129  |
| C    | -5.211733 | -1.090395 | 2.713171  |
| H    | -5.105092 | -0.887899 | 0.577845  |
| H    | -1.583362 | 0.268013  | 2.757126  |
| H    | -2.706907 | -0.333392 | 4.889139  |
| H    | -6.225065 | -1.482755 | 2.693632  |
| H    | -5.035568 | -1.208861 | 4.860190  |
| C    | -3.372775 | 1.524407  | -0.824646 |
| C    | -4.775285 | 3.575152  | -2.143318 |
| C    | -4.451401 | 2.165990  | -0.200084 |

|   |           |           |           |
|---|-----------|-----------|-----------|
| C | -3.000818 | 1.931423  | -2.118006 |
| C | -3.699349 | 2.943820  | -2.773653 |
| C | -5.147067 | 3.184841  | -0.857110 |
| H | -4.750798 | 1.876310  | 0.801722  |
| H | -2.162572 | 1.450363  | -2.615433 |
| H | -3.400192 | 3.243408  | -3.774476 |
| H | -5.979909 | 3.672967  | -0.357779 |
| H | -5.316796 | 4.368296  | -2.651751 |
| C | 3.207403  | -0.395493 | 1.473842  |
| C | 4.493075  | -1.176419 | 3.848638  |
| C | 4.518387  | -0.899107 | 1.444620  |
| C | 2.549177  | -0.300024 | 2.708018  |
| C | 3.187076  | -0.687610 | 3.888497  |
| C | 5.157174  | -1.282332 | 2.623704  |
| H | 5.041426  | -1.000808 | 0.498800  |
| H | 1.530881  | 0.075174  | 2.735776  |
| H | 2.661817  | -0.607894 | 4.836535  |
| H | 6.171811  | -1.669932 | 2.585111  |
| H | 4.991131  | -1.479224 | 4.765924  |
| C | 3.357052  | 1.327771  | -0.902241 |
| C | 4.863539  | 3.256733  | -2.288926 |
| C | 3.036537  | 1.673066  | -2.227486 |
| C | 4.433527  | 1.973825  | -0.279610 |
| C | 5.184098  | 2.928446  | -0.972583 |
| C | 3.785001  | 2.625732  | -2.916176 |
| H | 2.201034  | 1.188433  | -2.726227 |
| H | 4.692193  | 1.732416  | 0.744672  |
| H | 6.016696  | 3.418698  | -0.474915 |
| H | 3.525989  | 2.876173  | -3.941449 |
| H | 5.447340  | 4.000476  | -2.824727 |
| C | 0.031022  | 2.722386  | 0.726792  |
| C | 1.174738  | 2.896930  | 1.655323  |
| C | 2.299021  | 3.616748  | 1.482202  |
| H | 1.035950  | 2.428620  | 2.634186  |
| H | 3.049594  | 3.682706  | 2.266321  |
| H | 2.512716  | 4.153510  | 0.563362  |
| C | -1.236408 | 3.162550  | 1.481315  |
| H | -1.379591 | 2.608809  | 2.417662  |
| H | -2.141880 | 3.052451  | 0.879796  |
| H | -1.163435 | 4.230869  | 1.753410  |
| C | 0.162738  | 3.513402  | -0.571471 |
| H | 0.233167  | 4.598551  | -0.370323 |
| H | -0.711504 | 3.362652  | -1.214741 |
| H | 1.053334  | 3.232968  | -1.142531 |

11-TS

|                                  |                     |                |
|----------------------------------|---------------------|----------------|
| B3LYP SCF energy:                | -4697.34077400 a.u. |                |
| B3LYP enthalpy:                  | -4696.584218 a.u.   |                |
| B3LYP free energy:               | -4696.720478 a.u.   |                |
| M06 SCF energy in solution:      | -4701.05509090 a.u. |                |
| M06 enthalpy in solution:        | -4700.298535 a.u.   |                |
| M06 free energy in solution:     | -4700.434795 a.u.   |                |
| Three lowest frequencies (cm-1): | -311.8515           | 9.2273 12.1296 |
| Imaginary frequency:             | -311.8515 cm-1      |                |

Cartesian coordinates

| ATOM | X         | Y         | Z         |
|------|-----------|-----------|-----------|
| Pd   | -0.064399 | 0.195128  | 0.177671  |
| P    | 2.226199  | -0.413615 | 0.258599  |
| P    | -2.415306 | 0.003805  | 0.169793  |
| C    | 2.317869  | -2.188514 | 0.783199  |
| C    | 2.412668  | -4.917815 | 1.366098  |
| C    | 3.409793  | -2.721657 | 1.483421  |
| C    | 1.252894  | -3.015312 | 0.370483  |
| C    | 1.329847  | -4.383271 | 0.663901  |
| C    | 3.452604  | -4.084691 | 1.780355  |
| H    | 4.218664  | -2.075089 | 1.810805  |
| H    | 0.529077  | -5.050134 | 0.354685  |
| H    | 4.295147  | -4.492166 | 2.332944  |
| H    | 2.441328  | -5.980401 | 1.594276  |
| C    | -2.909100 | -1.748432 | 0.494084  |
| C    | -3.624417 | -4.431442 | 0.772801  |
| C    | -1.995156 | -2.744254 | 0.097658  |
| C    | -4.152045 | -2.091218 | 1.048078  |
| C    | -4.505157 | -3.433248 | 1.193464  |
| C    | -2.386461 | -4.084158 | 0.227557  |
| H    | -4.838416 | -1.314867 | 1.374459  |
| H    | -5.464626 | -3.697047 | 1.630499  |
| H    | -1.715298 | -4.878541 | -0.089589 |
| H    | -3.897542 | -5.478500 | 0.877731  |
| Ge   | -0.238386 | -2.133412 | -0.616166 |
| C    | -0.143580 | -2.694568 | -2.517059 |
| H    | -0.947383 | -2.216428 | -3.085060 |
| H    | -0.252403 | -3.781586 | -2.604685 |
| H    | 0.816222  | -2.402157 | -2.952085 |
| C    | 3.137757  | -0.399006 | -1.343669 |
| C    | 4.466449  | -0.395971 | -3.813589 |
| C    | 4.398108  | -1.007983 | -1.474577 |
| C    | 2.551473  | 0.208422  | -2.462071 |
| C    | 3.217257  | 0.210291  | -3.690968 |
| C    | 5.057171  | -1.005483 | -2.702111 |
| H    | 4.863509  | -1.491749 | -0.620910 |
| H    | 1.582692  | 0.689632  | -2.376848 |
| H    | 2.755260  | 0.694948  | -4.546224 |
| H    | 6.029969  | -1.481611 | -2.792713 |
| H    | 4.982178  | -0.394865 | -4.770311 |
| C    | 3.321072  | 0.488353  | 1.433533  |
| C    | 4.839436  | 1.975030  | 3.271290  |
| C    | 4.261640  | 1.427434  | 0.982850  |
| C    | 3.136603  | 0.317762  | 2.816582  |
| C    | 3.896007  | 1.050963  | 3.728005  |
| C    | 5.015743  | 2.163554  | 1.899693  |
| H    | 4.390689  | 1.601634  | -0.080133 |
| H    | 2.404085  | -0.396922 | 3.182844  |
| H    | 3.748036  | 0.902768  | 4.794421  |
| H    | 5.739370  | 2.888088  | 1.536295  |
| H    | 5.428543  | 2.548874  | 3.981567  |
| C    | -3.206589 | 0.420039  | -1.441436 |
| C    | -4.344235 | 1.122795  | -3.907332 |
| C    | -4.451801 | -0.105784 | -1.825092 |
| C    | -2.531703 | 1.292968  | -2.309117 |
| C    | -3.104881 | 1.643848  | -3.534195 |

|   |           |           |           |
|---|-----------|-----------|-----------|
| C | -5.015845 | 0.245294  | -3.051581 |
| H | -4.977478 | -0.797909 | -1.174431 |
| H | -1.559744 | 1.696368  | -2.041929 |
| H | -2.570603 | 2.321002  | -4.194679 |
| H | -5.977436 | -0.170929 | -3.340453 |
| H | -4.784771 | 1.392562  | -4.863680 |
| C | -3.356674 | 0.967740  | 1.428746  |
| C | -4.678968 | 2.431602  | 3.429000  |
| C | -3.053854 | 0.759771  | 2.785852  |
| C | -4.319125 | 1.927923  | 1.087480  |
| C | -4.975379 | 2.655065  | 2.084766  |
| C | -3.715367 | 1.480648  | 3.777896  |
| H | -2.295536 | 0.032426  | 3.064969  |
| H | -4.560626 | 2.109634  | 0.045315  |
| H | -5.719390 | 3.396344  | 1.805627  |
| H | -3.473936 | 1.305917  | 4.822926  |
| H | -5.190508 | 2.998110  | 4.202435  |
| C | -0.025546 | 2.131680  | 1.399754  |
| H | 0.321566  | 1.613565  | 2.296442  |
| H | -1.069654 | 2.428328  | 1.453581  |
| C | 0.880659  | 3.104005  | 0.907919  |
| C | 0.620441  | 4.203165  | 0.071433  |
| C | -0.817798 | 4.571878  | -0.235465 |
| H | -0.870543 | 5.292235  | -1.059567 |
| H | -1.302161 | 5.033552  | 0.638485  |
| H | -1.406494 | 3.697618  | -0.523484 |
| C | 1.584214  | 5.379338  | 0.139619  |
| H | 2.613550  | 5.042957  | 0.287674  |
| H | 1.317185  | 6.048530  | 0.971363  |
| H | 1.558686  | 5.975346  | -0.779774 |
| H | 1.927060  | 2.971326  | 1.183597  |
| C | 1.318850  | 3.231262  | -1.618860 |
| O | 0.358735  | 2.736118  | -2.169132 |
| O | 2.509990  | 3.402812  | -1.683141 |

12

|                                               |                                   |
|-----------------------------------------------|-----------------------------------|
| B3LYP SCF energy:                             | -4697.38523739 a.u.               |
| B3LYP enthalpy:                               | -4696.626024 a.u.                 |
| B3LYP free energy:                            | -4696.762621 a.u.                 |
| M06 SCF energy in solution:                   | -4701.08109079 a.u.               |
| M06 enthalpy in solution:                     | -4700.321877 a.u.                 |
| M06 free energy in solution:                  | -4700.458474 a.u.                 |
| Three lowest frequencies (cm <sup>-1</sup> ): | 11.5274      13.1742      17.0737 |

Cartesian coordinates

| ATOM | X         | Y         | Z         |
|------|-----------|-----------|-----------|
| Pd   | -0.039597 | 0.027369  | 0.045112  |
| P    | -2.393027 | -0.109715 | -0.054134 |
| P    | 2.259632  | -0.513053 | -0.067312 |
| C    | -2.922468 | -1.677306 | -0.887380 |
| C    | -3.612611 | -4.083388 | -2.129938 |
| C    | -4.191743 | -1.834732 | -1.462463 |
| C    | -1.977909 | -2.724351 | -0.937887 |
| C    | -2.349272 | -3.925378 | -1.555120 |
| C    | -4.534085 | -3.036206 | -2.085202 |

|    |           |           |           |
|----|-----------|-----------|-----------|
| H  | -4.905429 | -1.016245 | -1.445017 |
| H  | -1.644907 | -4.752312 | -1.602719 |
| H  | -5.514601 | -3.149414 | -2.539894 |
| H  | -3.873482 | -5.018329 | -2.619429 |
| C  | 2.499991  | -2.155370 | -0.892841 |
| C  | 2.764867  | -4.658949 | -2.107338 |
| C  | 1.389866  | -3.024917 | -0.932914 |
| C  | 3.722993  | -2.536346 | -1.464014 |
| C  | 3.852996  | -3.785740 | -2.072720 |
| C  | 1.548076  | -4.278982 | -1.536213 |
| H  | 4.567736  | -1.853808 | -1.451122 |
| H  | 4.799496  | -4.071652 | -2.523683 |
| H  | 0.712108  | -4.973188 | -1.574594 |
| H  | 2.860622  | -5.630678 | -2.585214 |
| Ge | -0.249469 | -2.368520 | -0.035057 |
| C  | -0.345393 | -3.267997 | 1.732466  |
| H  | 0.577246  | -3.100473 | 2.295823  |
| H  | -0.487714 | -4.347324 | 1.604406  |
| H  | -1.187025 | -2.869436 | 2.306867  |
| C  | -3.099660 | -0.145924 | 1.644120  |
| C  | -4.059967 | -0.071254 | 4.276169  |
| C  | -4.074258 | -1.060317 | 2.066212  |
| C  | -2.598799 | 0.802444  | 2.554356  |
| C  | -3.084817 | 0.840384  | 3.860612  |
| C  | -4.550492 | -1.021573 | 3.379927  |
| H  | -4.459198 | -1.804568 | 1.375357  |
| H  | -1.826063 | 1.498640  | 2.234448  |
| H  | -2.695256 | 1.577583  | 4.557521  |
| H  | -5.304015 | -1.736403 | 3.700134  |
| H  | -4.431291 | -0.043684 | 5.297182  |
| C  | -3.329740 | 1.222447  | -0.907903 |
| C  | -4.745795 | 3.185881  | -2.318907 |
| C  | -4.645407 | 1.550628  | -0.539000 |
| C  | -2.721334 | 1.899482  | -1.975063 |
| C  | -3.432946 | 2.875263  | -2.676717 |
| C  | -5.349705 | 2.526167  | -1.245546 |
| H  | -5.116484 | 1.054098  | 0.304439  |
| H  | -1.680938 | 1.709906  | -2.219514 |
| H  | -2.948294 | 3.403062  | -3.493178 |
| H  | -6.366311 | 2.775102  | -0.952478 |
| H  | -5.293715 | 3.949678  | -2.864663 |
| C  | 2.951351  | -0.680533 | 1.630154  |
| C  | 3.913699  | -0.795813 | 4.260514  |
| C  | 3.738597  | -1.762493 | 2.047672  |
| C  | 2.638958  | 0.341281  | 2.544728  |
| C  | 3.126075  | 0.283752  | 3.849863  |
| C  | 4.215703  | -1.818304 | 3.360407  |
| H  | 3.976999  | -2.562804 | 1.353418  |
| H  | 2.009483  | 1.170749  | 2.230001  |
| H  | 2.883060  | 1.078842  | 4.549577  |
| H  | 4.822590  | -2.662670 | 3.676725  |
| H  | 4.285436  | -0.841519 | 5.280737  |
| C  | 3.432470  | 0.611840  | -0.927971 |
| C  | 5.205078  | 2.232925  | -2.370230 |
| C  | 2.976295  | 1.344517  | -2.033603 |
| C  | 4.777785  | 0.714403  | -0.536223 |
| C  | 5.659021  | 1.520831  | -1.257509 |

|   |           |          |           |
|---|-----------|----------|-----------|
| C | 3.865162  | 2.147001 | -2.751711 |
| H | 1.923122  | 1.336226 | -2.293916 |
| H | 5.136599  | 0.173105 | 0.334257  |
| H | 6.697484  | 1.596656 | -0.945765 |
| H | 3.500185  | 2.717652 | -3.601194 |
| H | 5.892013  | 2.863499 | -2.928808 |
| C | 2.677892  | 5.374476 | 0.645731  |
| H | 3.701041  | 5.598303 | 0.354005  |
| H | 2.413131  | 5.591539 | 1.676972  |
| C | 1.810718  | 4.861062 | -0.229653 |
| C | 0.355115  | 4.502999 | 0.016184  |
| C | -0.081978 | 4.745215 | 1.465761  |
| H | -1.131294 | 4.461336 | 1.597709  |
| H | 0.016708  | 5.806481 | 1.725424  |
| H | 0.512103  | 4.155903 | 2.168449  |
| C | -0.518973 | 5.346411 | -0.942889 |
| H | -0.237190 | 5.160347 | -1.981867 |
| H | -0.401539 | 6.414724 | -0.725598 |
| H | -1.578086 | 5.084677 | -0.829611 |
| H | 2.144018  | 4.660110 | -1.247694 |
| C | 0.215696  | 2.998706 | -0.396065 |
| O | 0.087255  | 2.159880 | 0.568767  |
| O | 0.261588  | 2.712375 | -1.606299 |

13-TS

|                                  |           |         |                     |
|----------------------------------|-----------|---------|---------------------|
| B3LYP SCF energy:                |           |         | -4697.28455017 a.u. |
| B3LYP enthalpy:                  |           |         | -4696.528487 a.u.   |
| B3LYP free energy:               |           |         | -4696.662705 a.u.   |
| M06 SCF energy in solution:      |           |         | -4701.01499410 a.u. |
| M06 enthalpy in solution:        |           |         | -4700.258931 a.u.   |
| M06 free energy in solution:     |           |         | -4700.393149 a.u.   |
| Three lowest frequencies (cm-1): | -165.3664 | 15.8229 | 16.7079             |
| Imaginary frequency:             | -165.3664 | cm-1    |                     |

Cartesian coordinates

| ATOM | X         | Y         | Z         |
|------|-----------|-----------|-----------|
| Pd   | -0.014267 | 0.437800  | -0.016961 |
| P    | -2.406002 | 0.029672  | -0.030442 |
| P    | 2.338764  | -0.086648 | 0.025057  |
| C    | -2.774889 | -1.246890 | -1.323701 |
| C    | -3.207187 | -3.274921 | -3.200916 |
| C    | -4.017365 | -1.363924 | -1.964947 |
| C    | -1.737800 | -2.158980 | -1.607252 |
| C    | -1.978422 | -3.171557 | -2.544616 |
| C    | -4.228877 | -2.371416 | -2.908110 |
| H    | -4.817484 | -0.665813 | -1.740169 |
| H    | -1.200113 | -3.892776 | -2.779110 |
| H    | -5.189295 | -2.447476 | -3.410940 |
| H    | -3.365371 | -4.058262 | -3.937854 |
| C    | 2.675823  | -1.431232 | -1.211375 |
| C    | 3.071972  | -3.558105 | -2.987757 |
| C    | 1.599135  | -2.286670 | -1.518760 |
| C    | 3.940978  | -1.657351 | -1.775632 |
| C    | 4.134607  | -2.712028 | -2.669286 |
| C    | 1.820850  | -3.350235 | -2.403435 |



|    |           |           |           |
|----|-----------|-----------|-----------|
| H  | 4.774146  | -1.008366 | -1.527126 |
| H  | 5.114189  | -2.871018 | -3.112202 |
| H  | 1.010817  | -4.031799 | -2.649323 |
| H  | 3.216757  | -4.379077 | -3.685465 |
| Ge | -0.084519 | -1.952181 | -0.533474 |
| C  | -0.167844 | -3.299224 | 0.920429  |
| H  | -0.194239 | -4.306411 | 0.488144  |
| H  | -1.066084 | -3.152782 | 1.525940  |
| H  | 0.713437  | -3.215447 | 1.562029  |
| C  | -2.998386 | -0.758371 | 1.537053  |
| C  | -3.858402 | -1.943928 | 3.935310  |
| C  | -3.996135 | -1.746608 | 1.527163  |
| C  | -2.433030 | -0.372835 | 2.763823  |
| C  | -2.867826 | -0.960810 | 3.953760  |
| C  | -4.421333 | -2.335260 | 2.718976  |
| H  | -4.435923 | -2.069496 | 0.589226  |
| H  | -1.673673 | 0.401132  | 2.787252  |
| H  | -2.425195 | -0.648742 | 4.895857  |
| H  | -5.190992 | -3.102263 | 2.694206  |
| H  | -4.188948 | -2.404687 | 4.862492  |
| C  | -3.634181 | 1.369586  | -0.337705 |
| C  | -5.401438 | 3.506318  | -0.797854 |
| C  | -4.291439 | 1.993942  | 0.733059  |
| C  | -3.865884 | 1.838838  | -1.642449 |
| C  | -4.747633 | 2.895195  | -1.869649 |
| C  | -5.169175 | 3.053824  | 0.501754  |
| H  | -4.112405 | 1.660530  | 1.749040  |
| H  | -3.365737 | 1.375189  | -2.487186 |
| H  | -4.918344 | 3.242886  | -2.884907 |
| H  | -5.668639 | 3.527403  | 1.342483  |
| H  | -6.084346 | 4.332758  | -0.974883 |
| C  | 2.817214  | -0.864547 | 1.639285  |
| C  | 3.491861  | -2.031900 | 4.107652  |
| C  | 3.620341  | -2.015165 | 1.690237  |
| C  | 2.353951  | -0.305596 | 2.842889  |
| C  | 2.697352  | -0.884814 | 4.066062  |
| C  | 3.952494  | -2.594590 | 2.916536  |
| H  | 3.982892  | -2.469668 | 0.774497  |
| H  | 1.746968  | 0.593274  | 2.823830  |
| H  | 2.336908  | -0.436098 | 4.987913  |
| H  | 4.571155  | -3.488027 | 2.936916  |
| H  | 3.750078  | -2.484731 | 5.061323  |
| C  | 3.674649  | 1.145154  | -0.283577 |
| C  | 5.744469  | 2.979573  | -0.779215 |
| C  | 4.008118  | 1.508394  | -1.598385 |
| C  | 4.361826  | 1.747120  | 0.780064  |
| C  | 5.388356  | 2.658699  | 0.531428  |
| C  | 5.047959  | 2.405312  | -1.843683 |
| H  | 3.471207  | 1.076092  | -2.437432 |
| H  | 4.103729  | 1.502051  | 1.803846  |
| H  | 5.914693  | 3.111507  | 1.367304  |
| H  | 5.304259  | 2.662639  | -2.867939 |
| H  | 6.553319  | 3.679810  | -0.970331 |
| C  | -0.012500 | 3.235816  | -0.646087 |
| C  | 1.240452  | 4.010695  | -0.549659 |
| C  | 2.160538  | 4.200168  | -1.510079 |
| H  | 1.392078  | 4.531575  | 0.394188  |

|   |           |          |           |
|---|-----------|----------|-----------|
| H | 3.032158  | 4.823696 | -1.333229 |
| H | 2.090921  | 3.745045 | -2.493501 |
| C | -1.212000 | 4.116921 | -0.294903 |
| H | -1.012429 | 4.751964 | 0.574415  |
| H | -2.106333 | 3.534105 | -0.073067 |
| H | -1.440058 | 4.784331 | -1.144210 |
| C | -0.209535 | 2.586573 | -2.015756 |
| H | -0.237406 | 3.366215 | -2.800131 |
| H | -1.156900 | 2.046376 | -2.083764 |
| H | 0.598171  | 1.896420 | -2.286576 |
| C | 0.050169  | 2.453206 | 1.593278  |
| O | -1.097569 | 2.403067 | 1.981337  |
| O | 1.198886  | 2.549846 | 1.962005  |

14-TS

|                                  |           |         |                     |
|----------------------------------|-----------|---------|---------------------|
| B3LYP SCF energy:                |           |         | -4811.63975893 a.u. |
| B3LYP enthalpy:                  |           |         | -4810.862200 a.u.   |
| B3LYP free energy:               |           |         | -4810.997684 a.u.   |
| M06 SCF energy in solution:      |           |         | -4815.38823978 a.u. |
| M06 enthalpy in solution:        |           |         | -4814.610681 a.u.   |
| M06 free energy in solution:     |           |         | -4814.746165 a.u.   |
| Three lowest frequencies (cm-1): | -205.7241 | 22.0561 | 22.9591             |
| Imaginary frequency:             | -205.7241 |         | cm-1                |

Cartesian coordinates

| ATOM | X         | Y         | Z         |
|------|-----------|-----------|-----------|
| Pd   | -0.039360 | -0.325454 | -0.289888 |
| P    | 2.299556  | 0.226198  | -0.039209 |
| P    | -2.412525 | -0.043428 | -0.043187 |
| C    | 2.566740  | 1.901773  | -0.762846 |
| C    | 2.843549  | 4.496506  | -1.753211 |
| C    | 3.791208  | 2.321322  | -1.297299 |
| C    | 1.462619  | 2.775416  | -0.721274 |
| C    | 1.626788  | 4.077240  | -1.207827 |
| C    | 3.924969  | 3.617320  | -1.800375 |
| H    | 4.633813  | 1.638033  | -1.335511 |
| H    | 0.798442  | 4.780199  | -1.178306 |
| H    | 4.871626  | 3.935647  | -2.228664 |
| H    | 2.942398  | 5.505134  | -2.146229 |
| C    | -2.853821 | 1.535340  | -0.883817 |
| C    | -3.382532 | 4.012773  | -2.046369 |
| C    | -1.868145 | 2.541913  | -0.831423 |
| C    | -4.083505 | 1.763452  | -1.511023 |
| C    | -4.342969 | 3.003372  | -2.100002 |
| C    | -2.159648 | 3.782447  | -1.408554 |
| H    | -4.828732 | 0.975168  | -1.557212 |
| H    | -5.291239 | 3.175613  | -2.601944 |
| H    | -1.425321 | 4.582958  | -1.382801 |
| H    | -3.578827 | 4.977028  | -2.508108 |
| Ge   | -0.190371 | 2.084121  | 0.125634  |
| C    | -0.271430 | 2.876441  | 1.940629  |
| H    | -1.176630 | 2.562449  | 2.464762  |
| H    | -0.276000 | 3.969306  | 1.852095  |
| H    | 0.604210  | 2.577671  | 2.523070  |
| C    | 2.673493  | 0.444796  | 1.758000  |

|   |           |           |           |
|---|-----------|-----------|-----------|
| C | 3.183521  | 0.688523  | 4.508842  |
| C | 3.501277  | 1.470164  | 2.239477  |
| C | 2.103115  | -0.457787 | 2.670277  |
| C | 2.364776  | -0.339715 | 4.036082  |
| C | 3.749583  | 1.593315  | 3.608446  |
| H | 3.946289  | 2.178819  | 1.547618  |
| H | 1.460999  | -1.257712 | 2.312308  |
| H | 1.923422  | -1.050387 | 4.729773  |
| H | 4.385678  | 2.397224  | 3.969487  |
| H | 3.378327  | 0.785550  | 5.573637  |
| C | 3.728521  | -0.785495 | -0.636212 |
| C | 5.893446  | -2.315487 | -1.573714 |
| C | 4.667945  | -1.318936 | 0.260795  |
| C | 3.883531  | -1.031841 | -2.012347 |
| C | 4.962893  | -1.787799 | -2.471865 |
| C | 5.741603  | -2.079577 | -0.207099 |
| H | 4.568070  | -1.145228 | 1.326068  |
| H | 3.148612  | -0.653156 | -2.711809 |
| H | 5.069596  | -1.969329 | -3.538036 |
| H | 6.459393  | -2.484576 | 0.501505  |
| H | 6.729453  | -2.907702 | -1.936566 |
| C | -2.883503 | 0.254343  | 1.720931  |
| C | -3.554031 | 0.655450  | 4.418425  |
| C | -3.931957 | 1.118648  | 2.072635  |
| C | -2.173268 | -0.404126 | 2.736434  |
| C | -2.512191 | -0.209158 | 4.076670  |
| C | -4.261811 | 1.319796  | 3.414089  |
| H | -4.484554 | 1.643691  | 1.299475  |
| H | -1.351615 | -1.064355 | 2.475065  |
| H | -1.953827 | -0.725137 | 4.853170  |
| H | -5.070467 | 1.997939  | 3.673468  |
| H | -3.810669 | 0.814944  | 5.462317  |
| C | -3.657379 | -1.295812 | -0.588266 |
| C | -5.519791 | -3.220338 | -1.441390 |
| C | -3.739102 | -1.653847 | -1.946601 |
| C | -4.510527 | -1.923313 | 0.335414  |
| C | -5.433686 | -2.879981 | -0.091047 |
| C | -4.671057 | -2.605171 | -2.363973 |
| H | -3.058206 | -1.207213 | -2.662610 |
| H | -4.461879 | -1.668006 | 1.387999  |
| H | -6.086769 | -3.355097 | 0.636217  |
| H | -4.724144 | -2.870787 | -3.416338 |
| H | -6.240068 | -3.964125 | -1.771853 |
| C | -0.092553 | -2.575727 | -1.719251 |
| H | -1.168586 | -2.687172 | -1.846371 |
| C | 0.668266  | -3.291680 | -2.839814 |
| H | 1.697410  | -2.931790 | -2.937094 |
| H | 0.179943  | -3.128276 | -3.806314 |
| H | 0.710051  | -4.377599 | -2.658378 |
| C | 0.304671  | -3.042500 | -0.359677 |
| C | 0.992919  | -4.109831 | 2.202255  |
| C | 1.630313  | -3.433122 | -0.042139 |
| C | -0.664751 | -3.238142 | 0.659357  |
| C | -0.327692 | -3.755216 | 1.910439  |
| C | 1.963835  | -3.948912 | 1.208651  |
| H | 2.404672  | -3.340395 | -0.795150 |
| H | -1.707835 | -3.034302 | 0.433987  |

|   |           |           |           |
|---|-----------|-----------|-----------|
| H | -1.110105 | -3.908810 | 2.651020  |
| H | 2.994248  | -4.237157 | 1.404176  |
| H | 1.254693  | -4.525991 | 3.171505  |
| C | -0.034863 | -0.721613 | -2.853991 |
| O | -1.172102 | -0.568876 | -3.245688 |
| O | 1.102715  | -0.358240 | -3.069008 |

15-TS

|                                  |           |         |                     |
|----------------------------------|-----------|---------|---------------------|
| B3LYP SCF energy:                |           |         | -4201.98082594 a.u. |
| B3LYP enthalpy:                  |           |         | -4201.309432 a.u.   |
| B3LYP free energy:               |           |         | -4201.428719 a.u.   |
| M06 SCF energy in solution:      |           |         | -4205.63310236 a.u. |
| M06 enthalpy in solution:        |           |         | -4204.961708 a.u.   |
| M06 free energy in solution:     |           |         | -4205.080995 a.u.   |
| Three lowest frequencies (cm-1): | -206.9033 | 19.0672 | 21.9917             |
| Imaginary frequency:             | -206.9033 | cm-1    |                     |

Cartesian coordinates

| ATOM | X         | Y         | Z         |
|------|-----------|-----------|-----------|
| Pd   | -0.194368 | -0.527889 | 0.173885  |
| P    | -1.464299 | 1.430125  | 0.722154  |
| P    | 1.812003  | -1.820673 | 0.083529  |
| C    | -0.530178 | 2.988573  | 0.325874  |
| C    | 0.938464  | 5.302902  | -0.279489 |
| C    | -0.979240 | 4.252267  | 0.747590  |
| C    | 0.675927  | 2.882488  | -0.393160 |
| C    | 1.391024  | 4.050668  | -0.695147 |
| C    | -0.249004 | 5.402084  | 0.448111  |
| H    | -1.894263 | 4.347729  | 1.323561  |
| H    | 2.316716  | 3.989592  | -1.262698 |
| H    | -0.605649 | 6.371970  | 0.784651  |
| H    | 1.510525  | 6.196293  | -0.516619 |
| C    | 3.304509  | -0.752062 | -0.151931 |
| C    | 5.499192  | 0.950483  | -0.500130 |
| C    | 3.093018  | 0.572084  | -0.585720 |
| C    | 4.606975  | -1.210263 | 0.106261  |
| C    | 5.700308  | -0.360566 | -0.064204 |
| C    | 4.205804  | 1.406161  | -0.761013 |
| H    | 4.774515  | -2.224588 | 0.457541  |
| H    | 6.703761  | -0.719490 | 0.148412  |
| H    | 4.069277  | 2.431150  | -1.096685 |
| H    | 6.347548  | 1.617607  | -0.630159 |
| Ge   | 1.210436  | 1.069625  | -0.963583 |
| C    | 0.990602  | 1.001624  | -2.939751 |
| H    | 1.650886  | 1.737077  | -3.414438 |
| H    | -0.042654 | 1.233048  | -3.214240 |
| H    | 1.244109  | 0.010297  | -3.327682 |
| C    | -1.742446 | -2.546238 | -0.184502 |
| H    | -0.877749 | -2.607285 | -0.853630 |
| C    | -1.970145 | -3.948299 | 0.394179  |
| H    | -2.807961 | -3.993893 | 1.097982  |
| H    | -1.084909 | -4.302510 | 0.932947  |
| H    | -2.189231 | -4.673113 | -0.407178 |
| C    | -2.872521 | -1.964542 | -0.938021 |
| C    | -5.003546 | -0.861160 | -2.474038 |

|   |           |           |           |
|---|-----------|-----------|-----------|
| C | -4.215723 | -2.050642 | -0.507988 |
| C | -2.643302 | -1.310524 | -2.172429 |
| C | -3.683420 | -0.770233 | -2.925974 |
| C | -5.256760 | -1.506589 | -1.260522 |
| H | -4.443114 | -2.539697 | 0.432752  |
| H | -1.623786 | -1.246761 | -2.548555 |
| H | -3.464972 | -0.289769 | -3.877612 |
| H | -6.278320 | -1.593625 | -0.896601 |
| H | -5.819216 | -0.448394 | -3.061939 |
| C | 1.877772  | -3.102612 | -1.276614 |
| H | 1.630224  | -2.567828 | -2.201476 |
| H | 1.031172  | -3.771631 | -1.077677 |
| C | 2.157321  | -2.791511 | 1.631846  |
| H | 1.265583  | -3.403609 | 1.796484  |
| H | 3.001804  | -3.467225 | 1.448471  |
| C | -3.137126 | 1.557048  | -0.080562 |
| H | -3.631330 | 0.621191  | 0.203845  |
| H | -2.966456 | 1.480713  | -1.159106 |
| C | -1.811407 | 1.634631  | 2.541334  |
| H | -2.550880 | 0.872365  | 2.799493  |
| H | -2.278136 | 2.615460  | 2.690045  |
| C | 2.417233  | -1.921692 | 2.866809  |
| H | 1.551403  | -1.290509 | 3.079298  |
| H | 3.296914  | -1.282972 | 2.736733  |
| H | 2.587335  | -2.559751 | 3.741201  |
| C | 3.164503  | -3.914070 | -1.466274 |
| H | 3.419933  | -4.495782 | -0.574090 |
| H | 4.015084  | -3.270115 | -1.709551 |
| H | 3.037346  | -4.623868 | -2.292013 |
| C | -4.033784 | 2.758731  | 0.237978  |
| H | -4.228697 | 2.858326  | 1.311498  |
| H | -5.002572 | 2.626596  | -0.257498 |
| H | -3.604862 | 3.698724  | -0.123098 |
| C | -0.564873 | 1.497879  | 3.423370  |
| H | -0.128679 | 0.498932  | 3.329655  |
| H | -0.828628 | 1.652528  | 4.475894  |
| H | 0.201916  | 2.234072  | 3.157434  |
| C | -1.783112 | -1.792926 | 2.086200  |
| O | -0.812555 | -2.236793 | 2.638833  |
| O | -2.886066 | -1.329493 | 2.160275  |

CO2

|                                  |                             |
|----------------------------------|-----------------------------|
| B3LYP SCF energy:                | -188.57757052 a.u.          |
| B3LYP enthalpy:                  | -188.562367 a.u.            |
| B3LYP free energy:               | -188.586668 a.u.            |
| M06 SCF energy in solution:      | -188.63297388 a.u.          |
| M06 enthalpy in solution:        | -188.617770 a.u.            |
| M06 free energy in solution:     | -188.642071 a.u.            |
| Three lowest frequencies (cm-1): | 646.8590 646.8590 1370.4469 |

Cartesian coordinates

| ATOM | X        | Y        | Z         |
|------|----------|----------|-----------|
| C    | 0.000000 | 0.000000 | 0.000000  |
| O    | 0.000000 | 0.000000 | 1.169583  |
| O    | 0.000000 | 0.000000 | -1.169583 |

HCOO  
B3LYP SCF energy: -189.17318093 a.u.  
B3LYP enthalpy: -189.149023 a.u.  
B3LYP free energy: -189.176737 a.u.  
M06 SCF energy in solution: -189.33137975 a.u.  
M06 enthalpy in solution: -189.307222 a.u.  
M06 free energy in solution: -189.334936 a.u.  
Three lowest frequencies (cm-1): 764.6702 1069.3226 1370.1625

Cartesian coordinates

| ATOM | X         | Y         | Z        |
|------|-----------|-----------|----------|
| C    | -3.911251 | -0.481833 | 0.000000 |
| H    | -5.063939 | -0.481833 | 0.000000 |
| O    | -3.392668 | 0.660068  | 0.000000 |
| O    | -3.392668 | -1.623733 | 0.000000 |
